# Supplementary material for: Turn-on fluorogenic and chromogenic detection of Fe3+and Cr3+in a completely water medium with polyacrylamide covalently bonding to rhodamine B using diethylenetriamine as a linker
Source: Royal Society of Chemistry journal article supplement (doi:10.1039/c4ra08640f), 2014-09-08
Supplement: c4ra08640f1.pdf [file c4ra08640f1.pdf]

## *Supporting Information*

*for*

### **Turn-on fluorogenic and chromogenic detection of Fe<sup>3+</sup> and Cr<sup>3+</sup> in completely water media with polyacrylamide covalent bonding rhodamine B using diethylenetriamine as a linker**

**TongMou Geng<sup>1\*</sup>, RongYi Huang<sup>1</sup>, DaYu Wu<sup>2</sup>**

*1 Anhui Key Laboratory of Functional Coordination Compounds, School of Chemistry and Chemical Engineering, Anqing Normal University, Anqing 246011, P. R. China*

*2 Institute of Petrochemical Technology, Changzhou University, Changzhou, 213164, P. R. China*

**Corresponding Author:**

TongMou Geng

Mailing Address: School of Chemistry and Chemical Engineering, Anqing Normal University, Anqing 246011, China

Telephone: +86-0556-5500090

Fax: +86-0556-5500090

E-mail addresses: gengtongmou@aqtc.edu.cn (TM Geng).

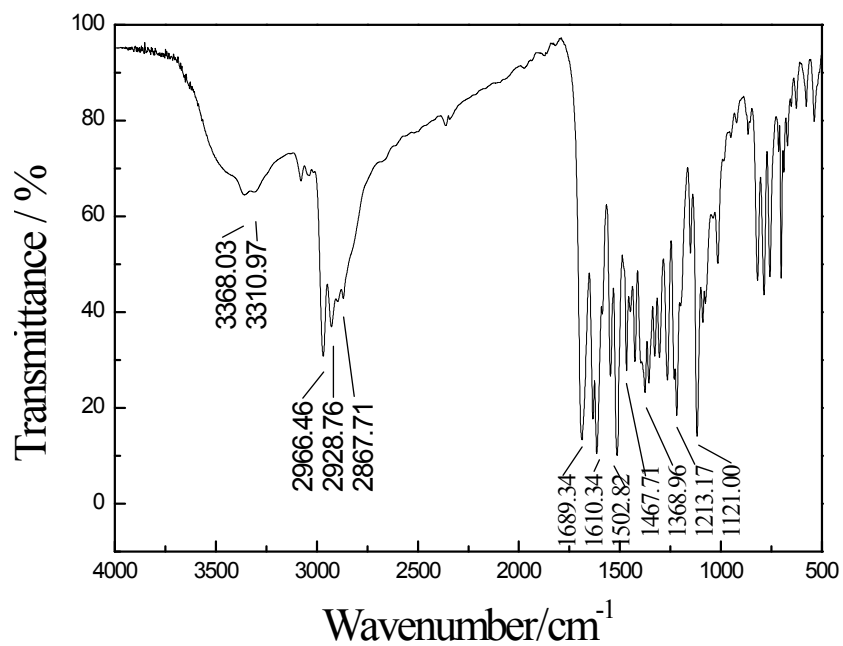

Fig. S1. FTIR spectrum of Rhodamine B-yl diethylenetriamine (RBD).

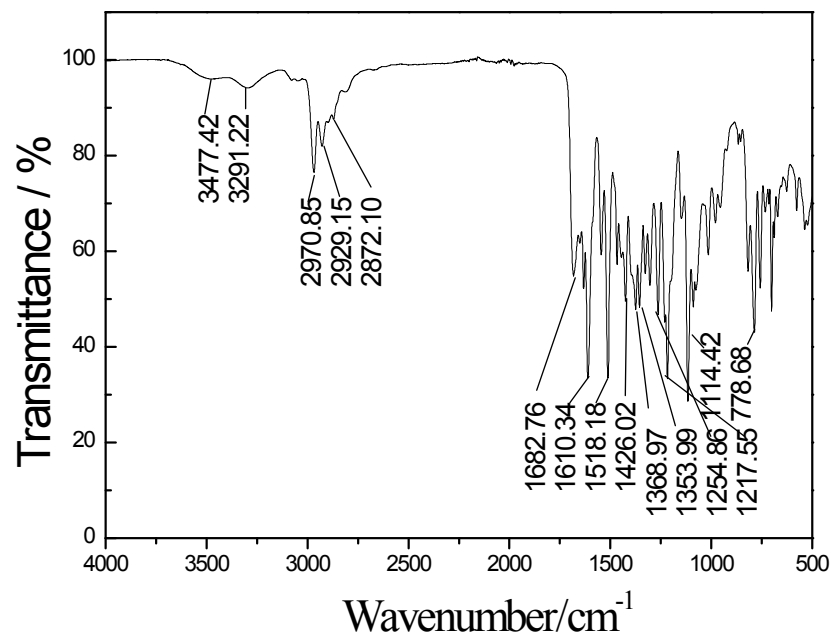

Fig. S2 FTIR spectrum of N-acryl-N''-(rhodamine B-yl) diethylenetriamine (ARBD).

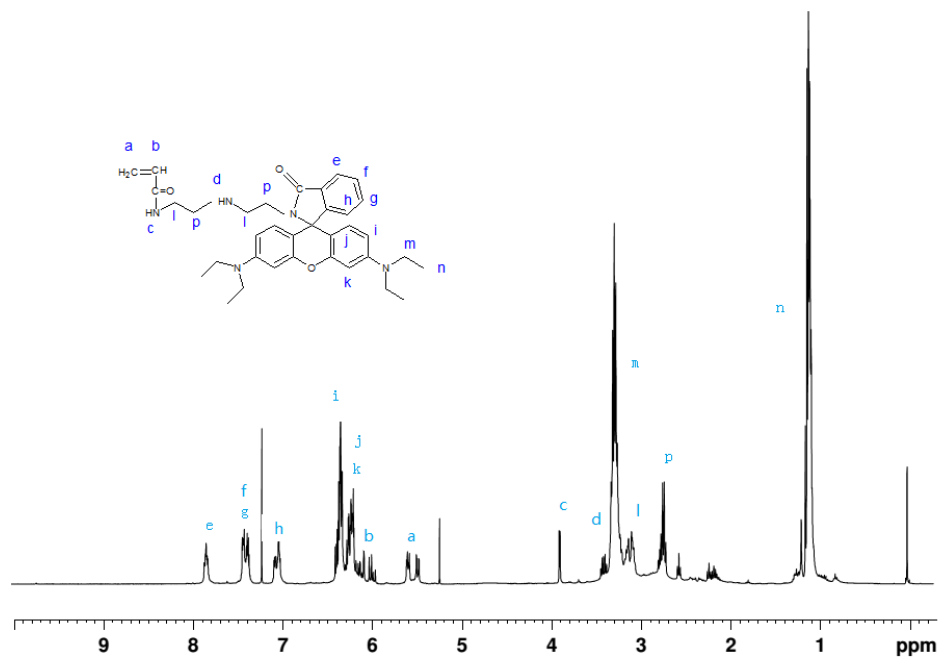

Fig. S3.  $^1\text{H}$ NMR spectrum of N-acryl-N''-(rhodamine B-yl) diethylenetriamine (ARBD).

$^1\text{H}$  NMR (400 MHz,  $\text{CDCl}_3$ ) of ARBD (d, ppm): 7.398 (m, 1H, Ph) **e**; 7.366 (m, 2H, Ph)**f g**; 7.203 (m, 1H, Ph) **h**; 6.384-6.304 (m, 4H, Ph) **i**; 6.254-6.203 (dd, 4H, Ph) **j k**; 6.196 -6.061 (m, 1H, = $\text{CH}_2$ )**b**; 5.555-5.576 (m, 2H, = $\text{CH}_2$ ) **a**; 3.883-3.873(s, NH, 1H) **c**; 3.303-3.252 (m, 1H, NH) **d**; 3.234 (t, 8H,  $\text{NCH}_2$ ) **m**; 3.206-3.066 (m, 4H,  $\text{NCH}_2$ ) **l**; 2,747-2.711 (m, 4H,  $\text{NCH}_2$ ) **p**; 1.181-1.059 (t, 12H,  $\text{CH}_3$ ).

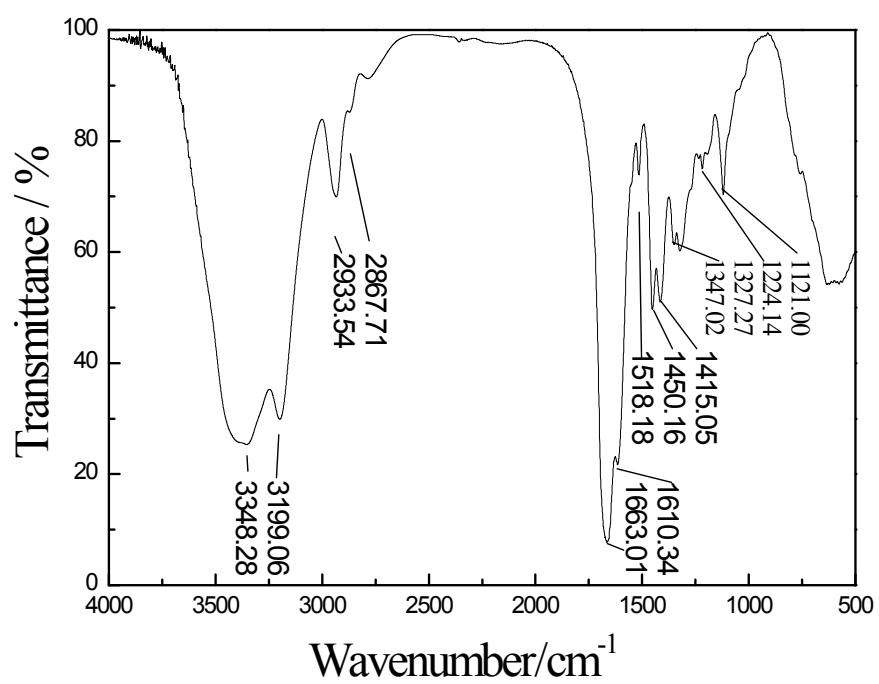

Fig. S4. FTIR spectrum of poly(AM-ARBD).

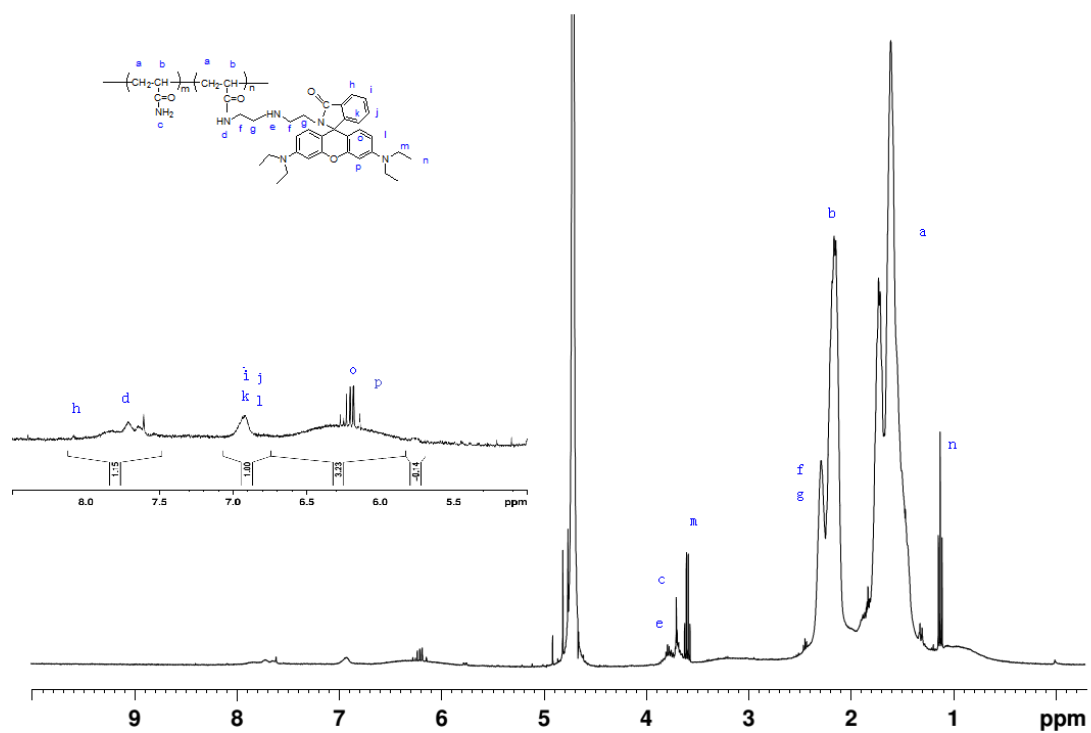

Fig. S5. <sup>1</sup>H NMR spectrum of poly(AM-ARBD).

<sup>1</sup>H NMR (400 MHz, D<sub>2</sub>O), δ: 0.944–0.979 (m, -CH<sub>3</sub>) n, 1.031–1.893 (d, -CH<sub>2</sub>-) a, 2.140–2.157 (m, -CH-) b, 2.406 (s, -CH<sub>2</sub>-), 3.618–3.564 (d, -CH<sub>2</sub>-NH-, -NH-) m, 3.691 (m, -CO-NH<sub>2</sub>) c, 3.699 (d, -CH<sub>2</sub>-NH-CH<sub>2</sub>-) e, 6.142–6.532 (m, Φ-H) op, 7.079–7.172 (m, -Φ-H) ijkl, 7.539–7.818 (s, -CO-NH-) d, 7.870 (m, Φ-H) h.

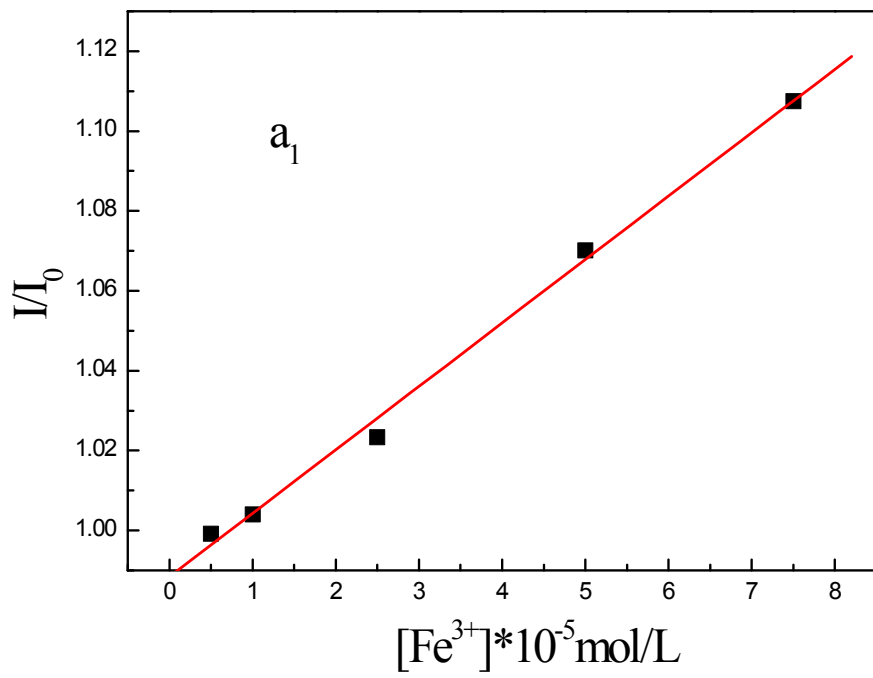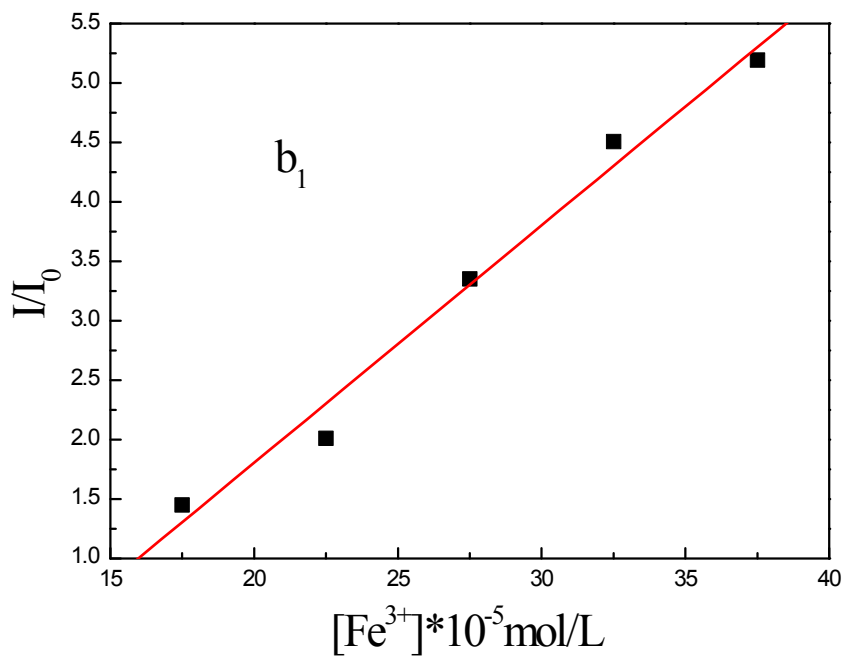

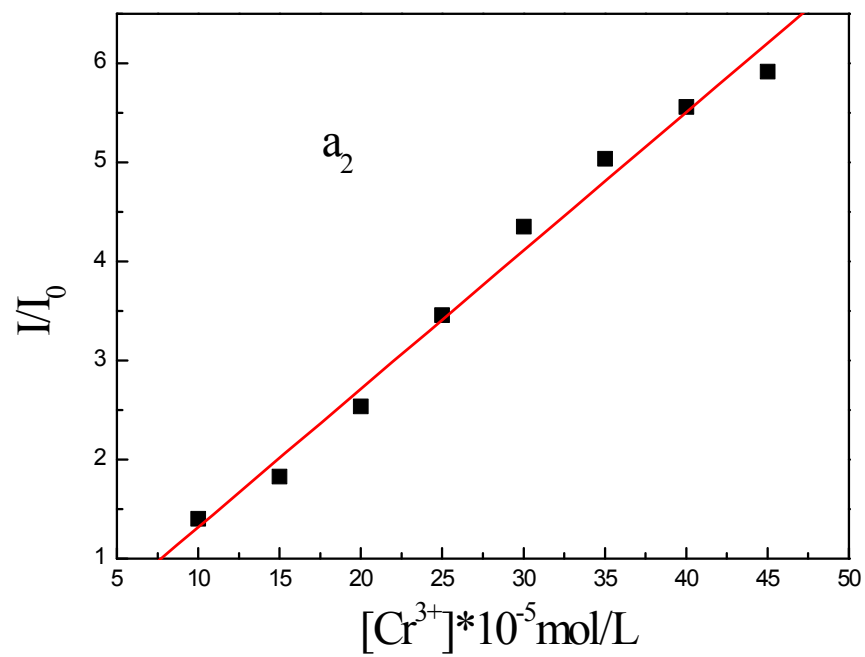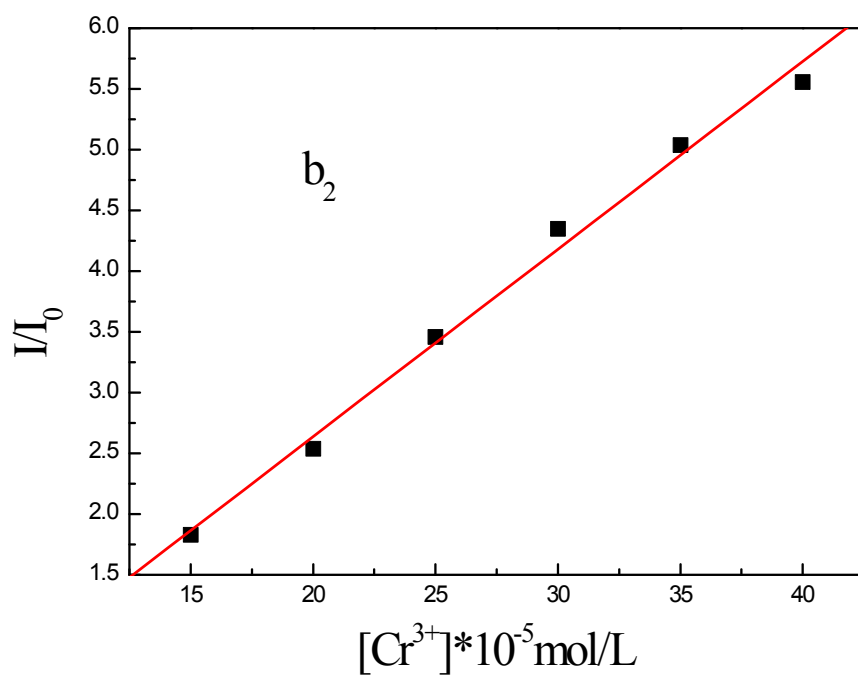

Fig. S 6. Linearized responses of poly(AM-ARBD) to Fe<sup>3+</sup> (a<sub>1</sub>-a<sub>2</sub>) or Cr<sup>3+</sup> (b<sub>1</sub>-b<sub>2</sub>) ions.
